# Supplementary material for: Investigating the effect of high-rise construction compared to flat construction on the amount of heating and cooling energy consumption in the buildings, considering the comfort PMV index: A case study
Source: Research Square preprint supplement (doi:10.21203/rs.3.rs-5584179/v1), 2024-12-25
Supplement: Supplementary file 1 [file 0a9594908e821a12ad9a0438.docx]

Table 3: Details used in the modeling of buildings in this article

| **Parameter** | **Value** |
| --- | --- |
| Occupancy (People/m2) | 0.11 |
| Winter clothing (Clo) | 1 |
| Summer clothing (Clo) | 0.5 |
| Heating set point (oC) | 22 |
| Cooling set point (oC) | 24 |
| Glazing Type | Double 6mm/6mm Arg |
| Lighting power density (W/m2-100 lux) | 5 |
| ACH | 5 |
| HVAC type | Fan coil unit |
| Heating | Natural gas |
| Cooling | Electricity |
| DHW | Same as HVAC |
