# Supplementary material for: Investigating the effect of high-rise construction compared to flat construction on the amount of heating and cooling energy consumption in the buildings, considering the comfort PMV index: A case study
Source: Research Square preprint supplement (doi:10.21203/rs.3.rs-5584179/v1), 2024-12-25
Supplement: Supplementary file 2 [file 1349f8c52c2296c4546aff1b.docx]

| **Climatic properties** | | **Arak** | **Shar-e Kord** | **Yazd** |
| --- | --- | --- | --- | --- |
| **Height above mean sea level**  **(*m*)** | | 1742 | 2045 | 1212 |
| **Summer conditions**  **at 15:00** | **DBo C** | 35 | 33 | 40 |
| **WBo C** | 16 | 18 | 18 |
| **RH %** | 17 | 23 | 12 |
| **Summer conditions**  **at 6:00** | **DBo C** | -12 | -14 | -5 |
| **RH %** | 79 | 81 | 71 |

Table 2: The most important climate parameters of the three cities of Arak, Shahr-e Kord and Yazd in different seasons.
