# Supplementary material for: Investigating the effect of high-rise construction compared to flat construction on the amount of heating and cooling energy consumption in the buildings, considering the comfort PMV index: A case study
Source: Research Square preprint supplement (doi:10.21203/rs.3.rs-5584179/v1), 2024-12-25
Supplement: Supplementary file 3 [file 5965d3161e36c1bb17904c0f.docx]

| **Scenario No.** | **No. of**  **common walls** | **Percentage of load difference**  **(%)** | |
| --- | --- | --- | --- |
| **Heating** | **Cooling** |
| 1 | 0 | 58.9 | 67.1 |
| 2 | 2 | 39.6 | 47.4 |
| 3 | 3 | 28.5 | 45.1 |
| 4 | 4 | 8.8 | 6.5 |
| 5 | 3 | 27.2 | 49.2 |
| 6 | 4 | 5.6 | 5.7 |
| 7 | 5 | 0 | 0 |
| 8 | 4 | 5.3 | 4.9 |

Table 4: Details of name, number of floors and blocks of 8 different scenarios used in this paper
