# Supplementary material for: Investigating the effect of high-rise construction compared to flat construction on the amount of heating and cooling energy consumption in the buildings, considering the comfort PMV index: A case study
Source: Research Square preprint supplement (doi:10.21203/rs.3.rs-5584179/v1), 2024-12-25
Supplement: Supplementary file 4 [file 969d537238bc78d83db86002.docx]

| **Scenario No.** | **Name** | **No. of**  **blocks** | **No. of**  **floors** | **No. of**  **units per floor** | **No. of**  **common walls** |
| --- | --- | --- | --- | --- | --- |
| 1 | 200*1*1 | 200 | 1 | 1 | 0 |
| 2 | 40*5*1 | 40 | 5 | 1 | 2 |
| 3 | 20*5*2 | 20 | 5 | 2 | 3 |
| 4 | 10*5*4 | 10 | 5 | 4 | 4 |
| 5 | 10*10*2 | 10 | 10 | 2 | 3 |
| 6 | 2*25*4 | 2 | 25 | 4 | 4 |
| 7 | 1*25*8 | 1 | 25 | 8 | 5 |
| 8 | 1*50*4 | 1 | 50 | 4 | 4 |

Table 1: Details of name, number of floors and blocks of 8 different scenarios used in this article
